11.02.2004

Dr. Indika Bandara Gawarammana,  
Lecturer/Senior Registrar  
Department of Medicine,  
Faculty of Medicine  
University of Peradeniya  
Peradeniya.

Dear Sir,

**Ethical clearance for the project to investigate circumstances and survival  
in patients with paraquat poisoning**

Herewith I am sending you a copy of the letter sent me by The Chairman of  
Ethical Committee, General Hospital (Teaching) Kandy.

Please note to take actions mentioned by Dr. Varugunam in this letter. However Ethical  
clearance has been granted for your project.

Thanking you,

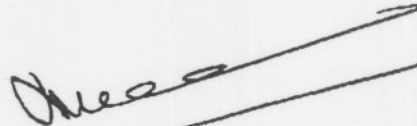

Director  
General Hospital - Kandy.

**Dr. M.G.P. SAMARASINGHE**  
Director  
General (Teaching) Hospital  
**KANDY.**
