# Supplementary material for: Improvement in Survival after Paraquat Ingestion Following Introduction of a New Formulation in Sri Lanka
Source: PLOS journal article supplement (doi:10.1371/journal.pmed.0050049), 2008-02-21
Supplement: S5 (10.1371/journal.pmed.0050049.s005) [file journal.pmed.0050049.s005]

My No.AA

The National Hospital of Sri Lanka,  
Colombo.

20.04.2004

Prof.Ravindra Fernando  
Senior Professor of Forensic Medicine,  
Dept.of Forensic Medicine & Toxicology  
Faculty of Medicine,  
University of Colombo.

OBTAINING PERMISSION TO CARRY OUT A  
STUDY ON PARAQUAT POISONING

Reference to your letter on the above subject, approval has been granted  
subject to consent from the respective consultants under whom the patients  
are admitted.



Director

My No.AA

The National Hospital of Sri Lanka  
Colombo.

29.01.2004

Prof. Ravindra Fernando,  
Professor of Forensic Medicine & Toxicology  
University of Colombo  
Dept. of Forensic Medicine & Toxicology  
Faculty of Medicine,  
Colombo.

REQUEST FOR A STUDY TO ESTABLISH THE CIRCUMSTANCES &  
SURVIVAL RATE FOLLOWING SUICIDE ATTEMPTS WITH  
GRAMOXONE" IN SRI LANKA.

This refers to your letter dated 11th November, 2003.

Permission for the above study has been granted subject to consent from the relevant consultants.

However the names of the consultants under whom the patients are admitted may have to be included in the study.

Director
